# Supplementary material for: Catalytic oxidation of formaldehyde in water by calcium phosphate-based Pt composites
Source: Royal Society of Chemistry journal article supplement (doi:10.1039/c5ra00353a), 2015-01-01
Supplement: c5ra00353a1.pdf [file c5ra00353a1.pdf]

Appendix A. Supplementary data

# Catalytic Oxidation of Formaldehyde in water by Calcium Phosphate-based Pt Composites

*Yakub Fam<sup>a</sup> and Toyoko Imae<sup>a,b\*</sup>*

<sup>a</sup>Department of Chemical Engineering, National Taiwan University of Science and Technology,  
43 Section 4, Keelung Road, Taipei 10607, Taiwan ROC,

<sup>b</sup>Graduate Institute of Applied Science and Technology, National Taiwan University of Science  
and Technology, 43 Section 4, Keelung Road, Taipei 10607, Taiwan ROC.

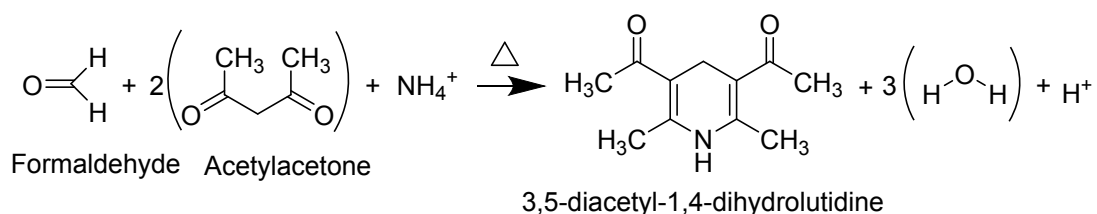

**Scheme S1.** Chemical reaction of HCHO with colorimetric agent (CA) for HCHO detection.

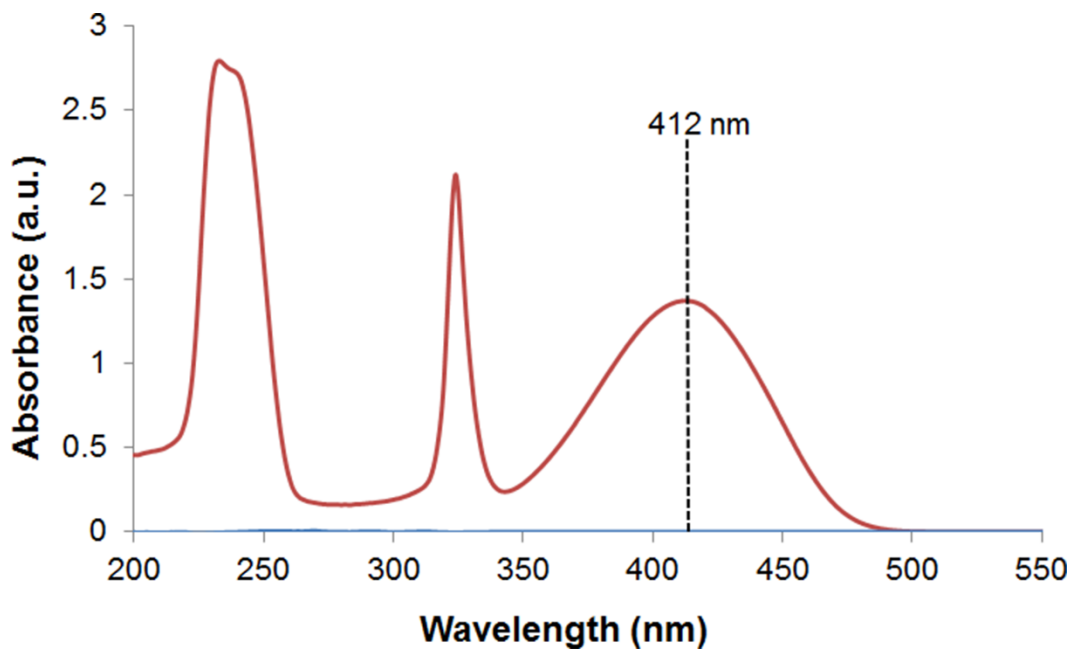

**Figure S1.** A UV-Vis absorption spectrum of a mixed solution of HCHO (4.7 ppm) and CA.

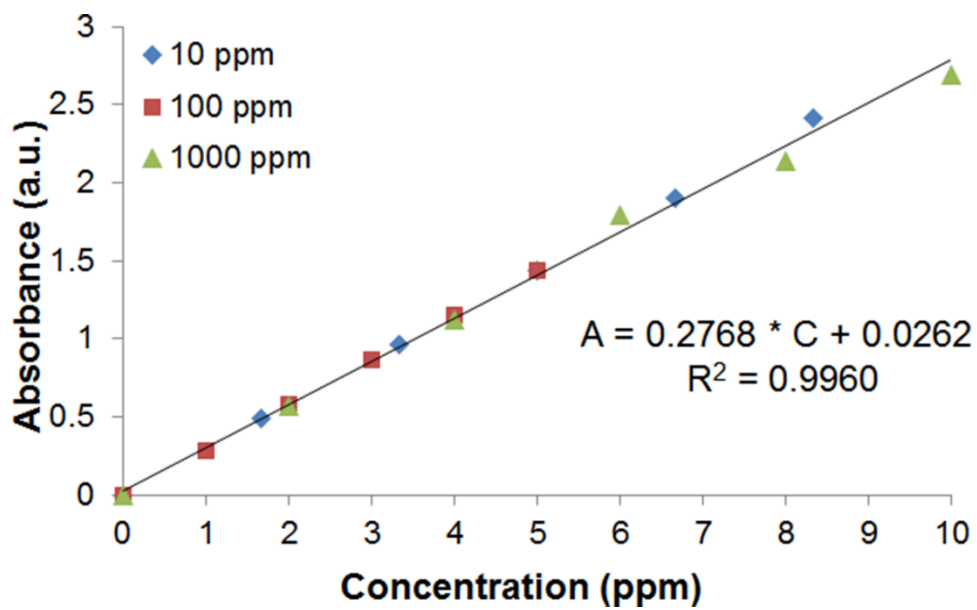

**Figure S2.** A standard calibration curve of HCHO prepared from HCHO stock solutions of 10, 100, and 1000 ppm.

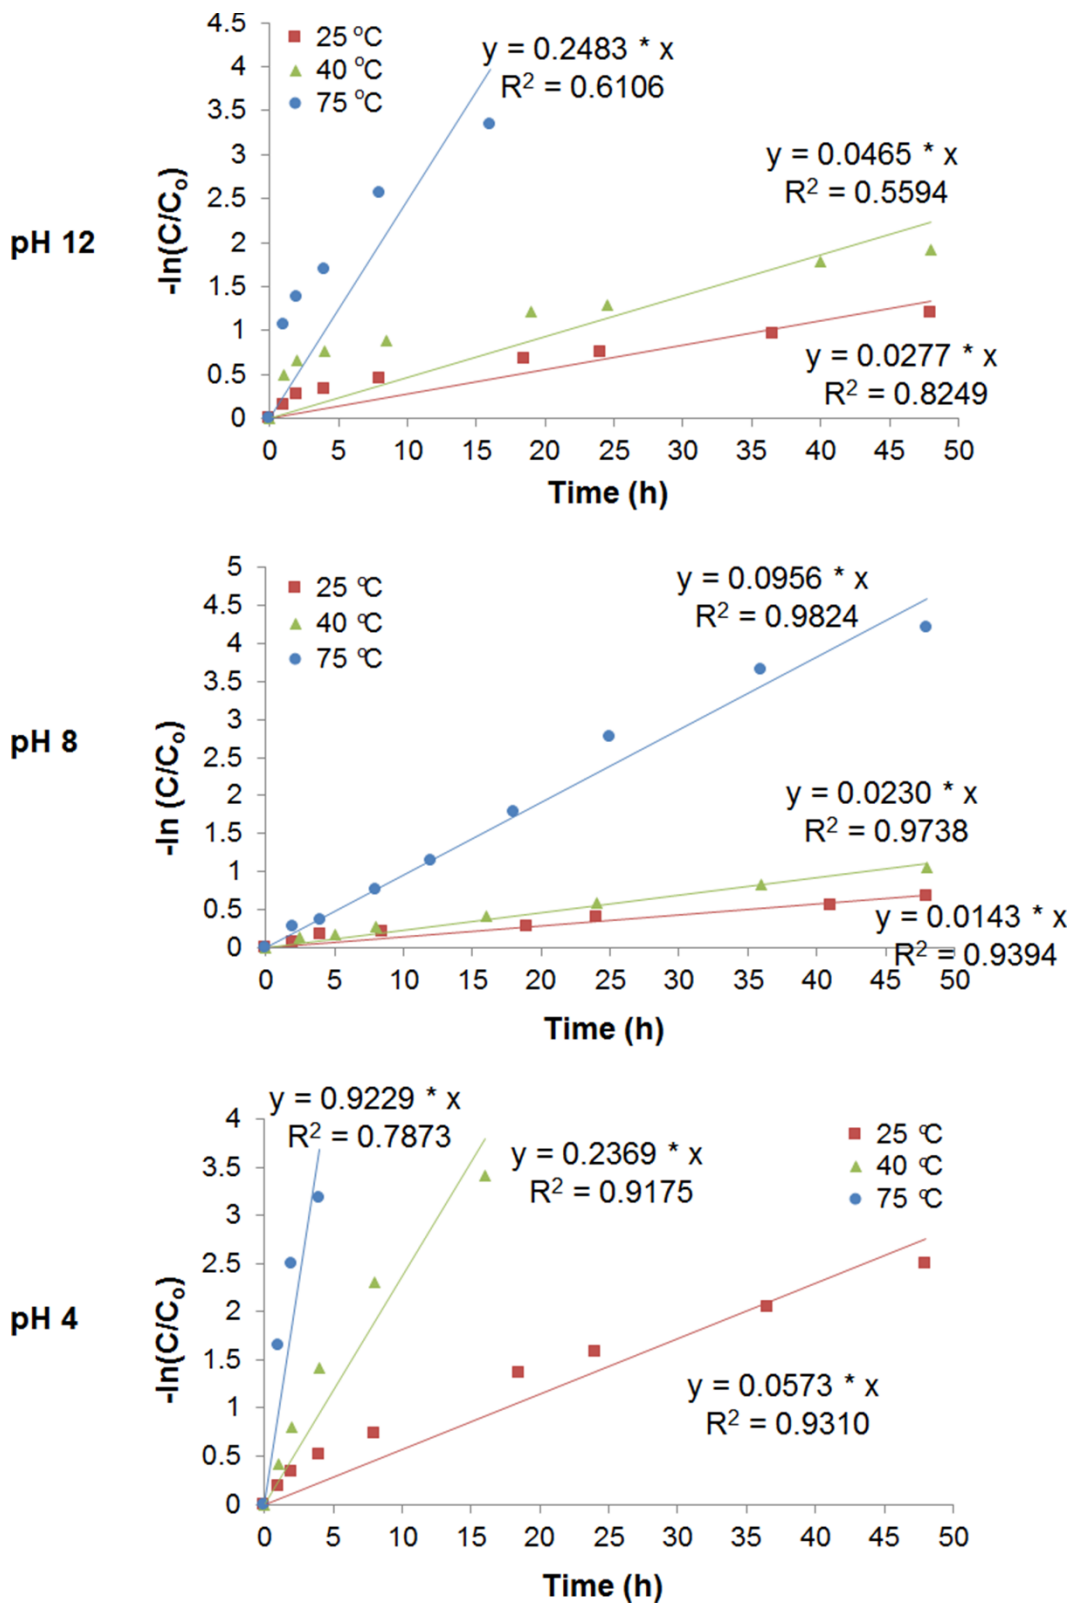

Figure S3. Replotting of Figure 3 and 6 based on equation (2).
